# Supplementary material
Source: PubMed Central journal article supplement (PMC7925753)
Supplement: 12192_2020_1185_MOESM1_ESM.pdf [file 12192_2020_1185_MOESM1_ESM.pdf]

**TABLE-S1 GENE SPECIFIC PRIMERS USED FOR REAL TIME PCR ANALYSIS OF  
DIFFERENT ISOFORMS OF HSP40**

| GENES NAME | PRIMER SEQUENCE 5'----3' | GENES NAME | PRIMER SEQUENCE 5'----3' |
|------------|--------------------------|------------|--------------------------|
| DNAJA1 FP  | GCTGCAACGGAAGGAAGATA     | DNAJC6 FP  | GAGACCGCTGACTGTGAATG     |
| DNAJA1 RP  | TGATAATATCGCCTGGCTCC     | DNAJC6 RP  | ATAGCTGGGCTCCATGTCTG     |
| DNAJA2 FP  | AGGCATGAAACATGGACAGA     | DNAJC7 FP  | AGTGCGATGTGGTAATGGC      |
| DNAJA2 RP  | CATGTGCAAATCATTCCCAT     | DNAJC7 RP  | GCTTCATTGTAATCTTTCTTGGC  |
| DNAJA3 FP  | GCTGCTGACATTGAGACCTG     | DNAJC8 FP  | ATTGAAAGACTGACCCGTCC     |
| DNAJA3 RP  | CTCTTTCTGGCTGGCATTTC     | DNAJC8 RP  | TTTTTGT CAGGATGCACCAA    |
| DNAJA4 FP  | CTCTCCGCCTTGGTCATAAA     | DNAJC9 FP  | GCGTGCAGTACACAGAGGAA     |
| DNAJA4 RP  | TCAAGAAGGCCTATCGGAAG     | DNAJC9 RP  | CTTCTTTGGCCTCTCTCTGA     |
| DNAJB1 FP  | ATGAGGGTCTCCATGGAATG     | DNAJC10 FP | TGCTCAGACATGCCAGAAAG     |
| DNAJB1 RP  | CTACGACGTGCTCAGCGA       | DNAJC10 RP | TTAAGGCAGCGATTGCTTTT     |
| DNAJB2 FP  | AGAATCATGGAGAACGGGC      | DNAJC11 FP | GGAGGAGCTGGACAATGAAG     |
| DNAJB2 RP  | GACCTGGAAGTGACTGACGG     | DNAJC11 RP | AGCTCTGGGTCTCTGTGCTT     |
| DNAJB3 FP  | GCAGCTTCAAGTCCATGTC      | DNAJC12 FP | TTTCCGAGGGAAGAAGGACT     |
| DNAJB3 RP  | ACTCAACTCTCCATCTTCCTC    | DNAJC12 RP | ATTCTGCCAGGATTTGTTCA     |
| DNAJB4 FP  | ATGATCAGTTTGGGGAGGAA     | DNAJC13 FP | GGGATAGGATGGGCTTGGCT     |
| DNAJB4 RP  | AATTTCAAAGGGGTGGACC      | DNAJC13 RP | ATTTCTCTGCCAGGCACTC      |
| DNAJB5 FP  | TAAGTGACCCCAAGAAACGG     | DNAJC14 FP | TTTCCATGTACTGGGGGTTG     |
| DNAJB5 RP  | CACCAAAGAAGGAGGCAAAAG    | DNAJC14 RP | AAAACCTTGAAGGCCTCCTC     |
| DNAJB6A FP | TCACTGTCTCTCTGAGGAGGA    | DNAJC15 FP | GAGTTTGCCTACGCTGAGT      |
| DNAJB6A RP | TCAAGTCCGGTCTAGTGATTGC   | DNAJC15 RP | AAGAGCTGCAACACCCAGTC     |
| DNAJB6B FP | GTCCTGGAGCTGTGAGGAGA     | DNAJC16 FP | GAGGGACGGAAGAGATGACA     |
| DNAJB6B RP | TCTGCACGCCTAGAACTTCA     | DNAJC16 RP | GTTTCGGGTGATGAAGTCGT     |
| DNAJB7 FP  | GAATGCAGCTGGAGAACACA     | DNAJC17 FP | GCTAGGCATTGAGGAGAAGG     |
| DNAJB7 RP  | TAGGGGATCTCTGTGCTG       | DNAJC17 RP | CCTGAGAAAGCTGGTGGAAG     |
| DNAJB8 FP  | ACACCACCTTCTCATCCACC     | DNAJC18 FP | ACAGCTGCTGGGGTACAAA      |
| DNAJB8 RP  | TCCTTGCCGTTACAGTCAC      | DNAJC18 RP | GCACAGTTCTTGT CAGGGTG    |
| DNAJB9 FP  | AATGCAGATTGCAAAGATGAAA   | DNAJC19 FP | CTCTGGTAAAGGCGTGCAG      |
| DNAJB9 RP  | CAGCTCTGTGGAGGAGCAG      | DNAJC19 RP | CAGCAATGGTCAGTCCAAC      |
| DNAJB11 FP | AAGCCCAGGAGAAATTCCAG     | DNAJC20 FP | TGAAGCTGCCATGAAAGAGA     |
| DNAJB11 RP | ATGTCTCCATGGGAGCTCTG     | DNAJC20 RP | TTCCTTGGCTTCTCAAAGTC     |
| DNAJB12 FP | TATCAGCATCGCCCTCAAG      | DNAJC21 FP | TGGAAGATGCACCAAAACAA     |
| DNAJB12 RP | GGCAGTCTGTGGTTTCTGGT     | DNAJC21 RP | TCTTCTCTCCCAACACACA      |
| DNAJB13 FP | CATCATCCACCCAAATACTTC    | DNAJC22 FP | AGGAGTGGGCGAAGCTCTAT     |
| DNAJB13 RP | CAGTATGT CAGCAATGCC      | DNAJC22 RP | GGTGCCAGACCTTCACTAGC     |
| DNAJB14 FP | CCTGGAGCAACAGATGCTTT     | DNAJC23 FP | GGCGACATACTACCTCTGGC     |
| DNAJB14 RP | TGCCATTGTTTTGGTGGTTA     | DNAJC23 RP | AGGAATAATATTTGGCTGGG     |
| DNAJC1 FP  | GTTGGAAAACAGGAACCGAA     | DNAJC24 FP | GATTGGTACAGCATCTGGG      |
| DNAJC1 RP  | CAATTCGTGGGCAATCTTTT     | DNAJC24 RP | TCCTCCACTGTTCTGTGCTG     |
| DNAJC2 FP  | CGGAAGTGCTTACTGGTCTG     | DNAJC25 FP | CGCCTACGAGACTCAAGG       |
| DNAJC2 RP  | ACAGAGTGTAGAGGCAGAGGT    | DNAJC25 RP | GCACACACGCTGACCAAAAT     |
| DNAJC3 FP  | CAAGGAAAACCTTGATGAAGCAG  | DNAJC26 FP | GACCAGAGTACTTCTGTGGG     |
| DNAJC3 RP  | GCGTTAAGTGCTTGTGAACG     | DNAJC26 RP | TGCATACTCTCTGCCACTCC     |
| DNAJC4 FP  | AGTCCATGACAAGTCTGCC      | DNAJC27 FP | CTGAAAGCAAAGGGTTCTCTG    |
| DNAJC4 RP  | GCAGTACCCACGACTTGT       | DNAJC27 RP | TATTGGTGGTAGGGCGTTTC     |
| DNAJC5 FP  | TCACGGACGCCACAAAAG       | DNAJC28 FP | TGGAGCTCAAAGCTTTTGGGA    |
| DNAJC5 RP  | ACAGACAGCAGCAGCATAG      | DNAJC28 RP | AAGATCTGAGCCATCATACA     |
| DNAJC5B FP | TCATCCCGACAAGAATCCAG     | DNAJC29 FP | AAGGTCCCTTTTCCAAAGTC     |
| DNAJC5B RP | CAGCAAAAACAGCAGCAAC      | DNAJC29 RP | ACGTGCAAATCGTTCTGGAT     |
| DNAJC5G FP | CACCATCCAGACAAGAATCC     | DNAJC30 FP | TAAGAATGGGATCGGTGGAG     |
| DNAJC5G RP | GCAGCAGCAAAGTAGCAG       | DNAJC30 RP | TATGGGCACAGGAACACTCA     |

**TABLE-S2 GENE SPECIFIC PRIMERS USED FOR REAL TIME PCR ANALYSIS OF  
DIFFERENT ISOFORMS OF HSP70**

| <b>GENES NAME</b>    | <b>PRIMER SEQUENCE 5' ---- 3'</b> |
|----------------------|-----------------------------------|
| <b>HSPA1A RT FP</b>  | GAGCAGGTGTGTAACCCCAT              |
| <b>HSPA1A RT RP</b>  | AATCTTGGAAAGGCCCTAA               |
| <b>HSPA1B RT FP</b>  | GTGGATTAGGGCCTTTGTT               |
| <b>HSPA1B RT RP</b>  | TGAAGCAGCAAAGAGCTGAA              |
| <b>HSPA1L RT FP</b>  | CATGGCTACTGCCAAGGGAA              |
| <b>HSPA1L RT RP</b>  | GTGTCTGTGAAGGCCACGTA              |
| <b>HSPA2 RT FP</b>   | GACAACCAGAGCAGCGTACT              |
| <b>HSPA2 RT RP</b>   | CATCCGGTCAATGTCGTCCT              |
| <b>HSPA5 RT FP</b>   | CACAGTGGTGCCTACCAAGA              |
| <b>HSPA5 RT RP</b>   | TGATTGTCTTTTGTGAGGGGT             |
| <b>HSPA6 RT FP</b>   | CGTGCCCGCCTATTTCAATG              |
| <b>HSPA6 RT RP</b>   | AAAAATGAGCACGTTGCGCT              |
| <b>HSPA8.1 RT FP</b> | GCCTGGTGTGCTTATTCAGG              |
| <b>HSPA8.1 RT RP</b> | ACGGCCCTTGTGATTAGTGA              |
| <b>HSPA8.2 RT FP</b> | TTACCCGTGCCCGATTTGAA              |
| <b>HSPA8.2 RT RP</b> | CCTGGCATGCCTGTGAGTT               |
| <b>HSPA9 RT FP</b>   | GTGGCCTTTACAGCAGATGG              |
| <b>HSPA9 RT RP</b>   | GCTCCAATCTGACTCGGAGA              |
| <b>HSPA12 RT FP</b>  | GCCCGCGATTACTACCATGA              |
| <b>HSPA12 RT RP</b>  | TGCTCCCTCAGCTCCTGAA               |
| <b>HSPA13 RT FP</b>  | CCATCACAGTGTCGCCAGAA              |
| <b>HSPA13 RT RP</b>  | CTGCTGCTGTGGGTTTCAATTT            |
| <b>HSPA14 RT FP</b>  | TTGCAAATGATGCCGGTGAC              |
| <b>HSPA14 RT RP</b>  | CCTCTGAAAAGGCTGTGGGA              |
